# Supplementary material for: Acylated Anthocyanins from Red Cabbage and Purple Sweet Potato Can Bind Metal Ions and Produce Stable Blue Colors
Source: MDPI journal article supplement (doi:10.3390/ijms22094551), 2021-04-27
Supplement: s1 [file s1]

# **Acylated anthocyanins from red cabbage and purple sweet potato can bind metal ions and produce stable blue colors**

Julie-Anne Fenger,<sup>a\*</sup> Gregory T. Sigurdson,<sup>b</sup> Rebecca J. Robbins,<sup>c</sup> Thomas M. Collins,<sup>d</sup> M. Mónica Giusti,<sup>b</sup> Olivier Dangles<sup>a\*</sup>

## **Supplementary Information**

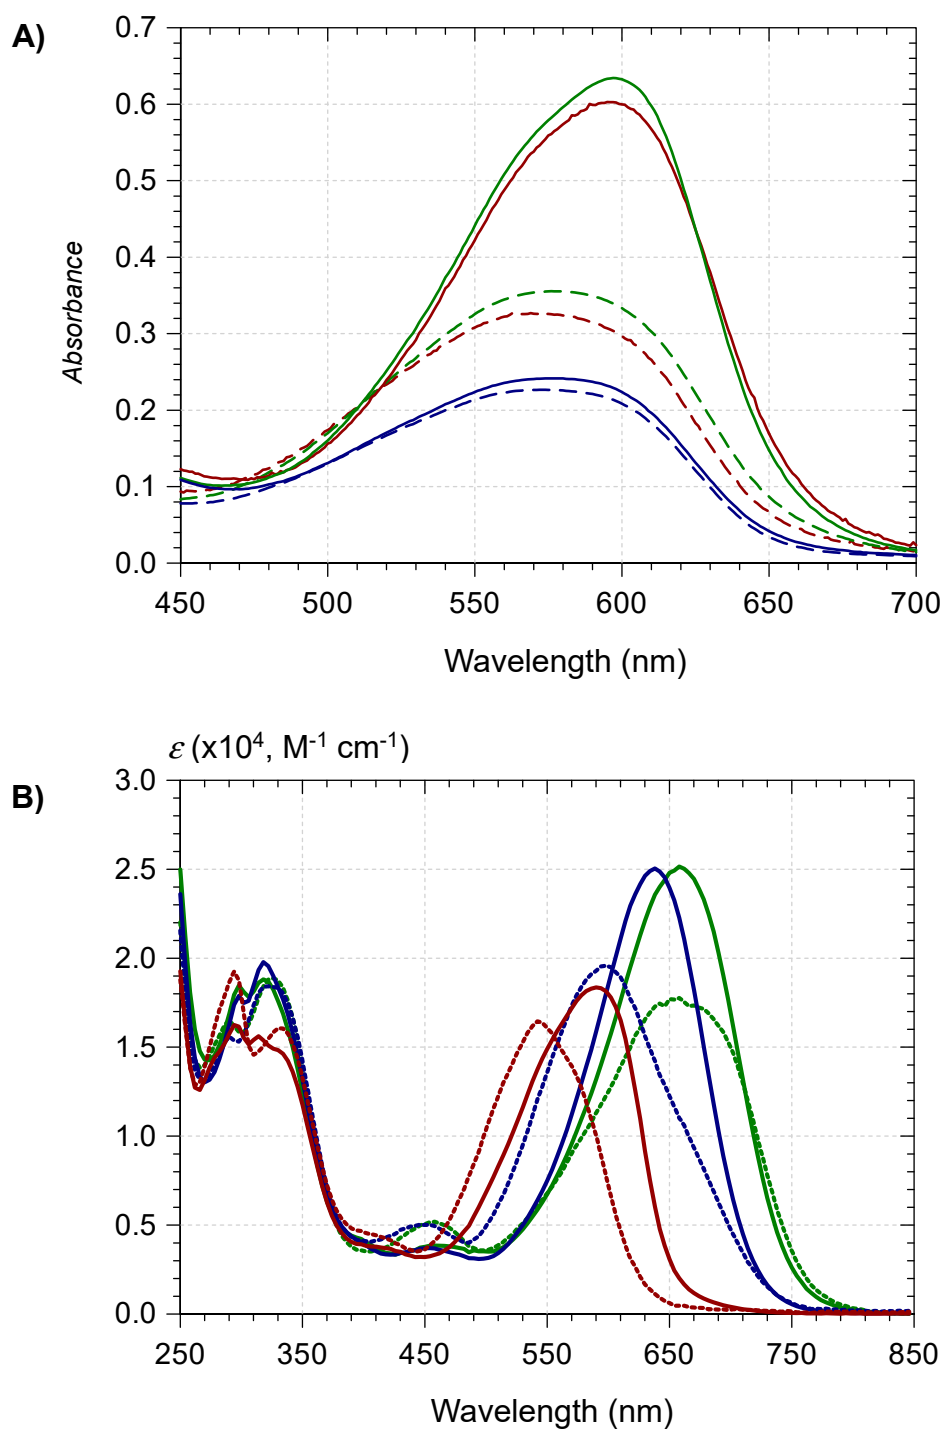

**Fig. 1-SI. A)** Visible spectra of PSP anthocyanins (solid lines) and their  $\text{Al}^{3+}$  complexes (dotted lines, 1 equiv.  $\text{Al}^{3+}$ ) recorded at pH 7 30 min after sample preparation. Pigment 4' (—, acyl = Fl), Pigment 6' (—, acyl = Cf), Pigment 7 (—, acyl = Cf, Cf). **B)** UV-visible spectra of pigment B at pH 7.0 (solid curves) and at pH 5.68 (dot curves). red: control, green: +  $\text{Fe}^{2+}$  (1 equiv.), blue: +  $\text{Al}^{3+}$  (1 equiv.).

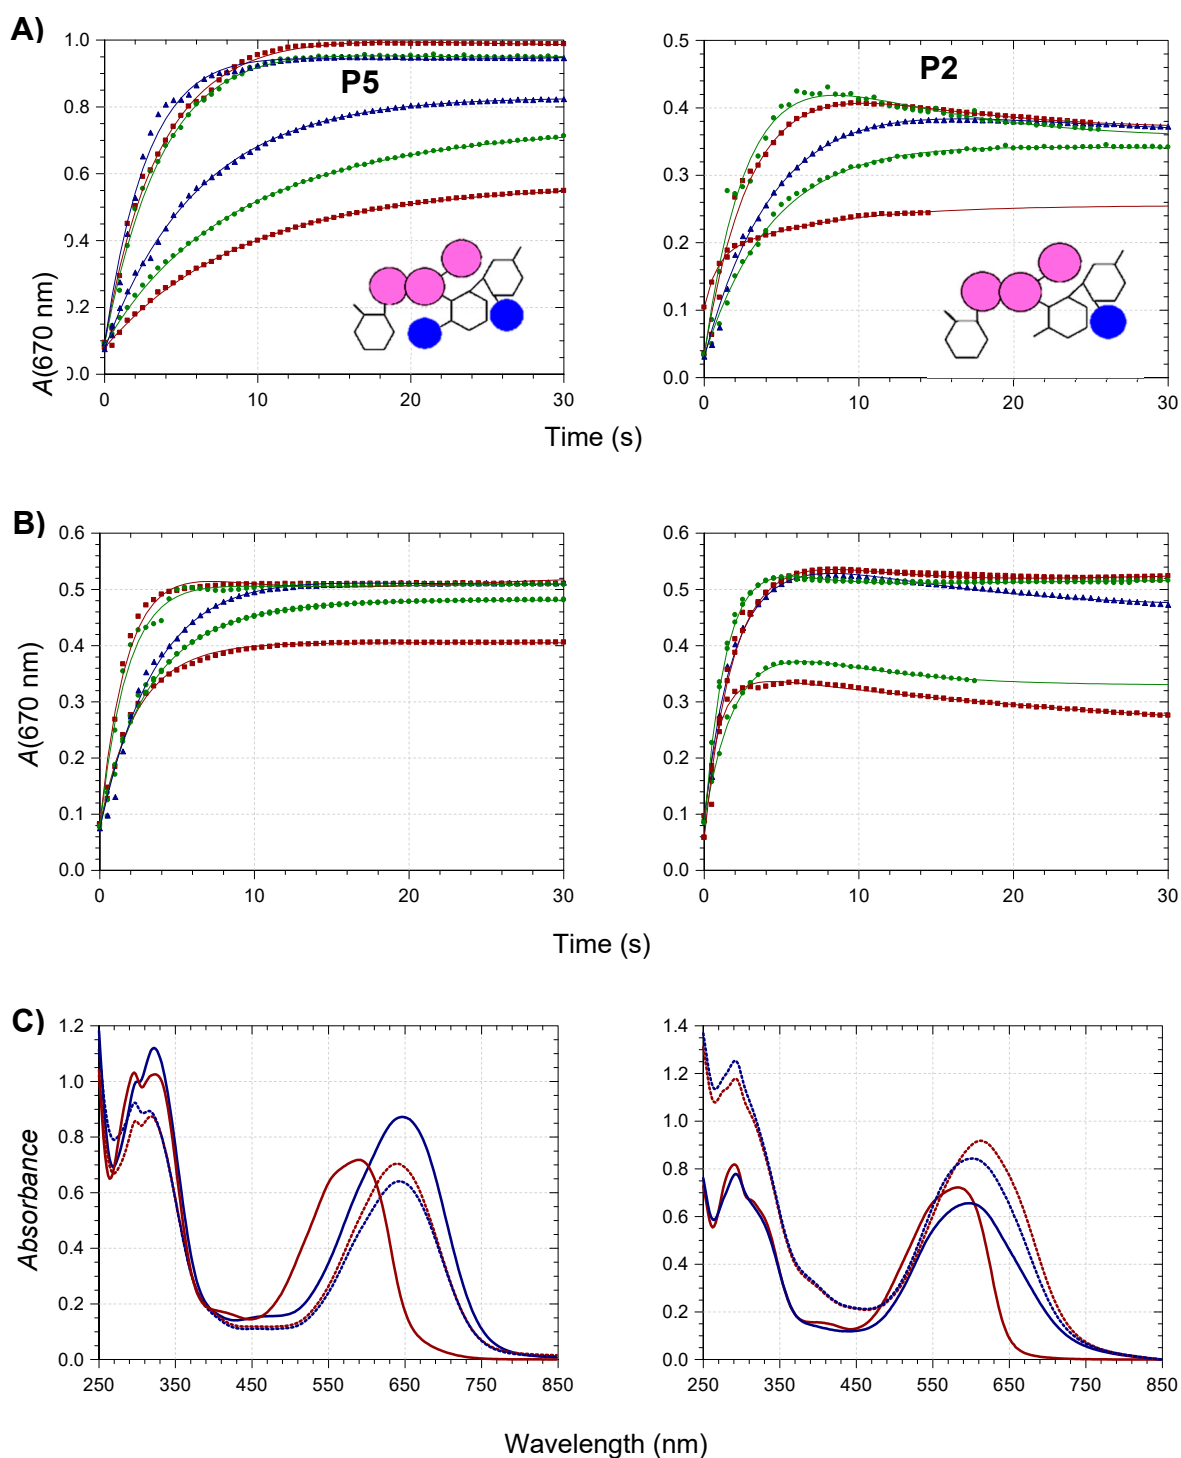

**Fig. 2-SI.** Iron - anthocyanin binding (successive addition of pigment ( $40 \mu\text{M}$  at pH 7,  $20 \mu\text{M}$  at pH 8) and  $\text{Fe}^{2+}$ ). **A & B)** Kinetic monitoring at pH 7 (A) or pH 8 (B). Iron/pigment molar ratio (from bottom to top curves) = 0.1, 0.3, 0.6, 1, 1.5, 2 (Pigment 5, pH 7), 0.3, 0.6, 1, 2, 4 (Pigment 2, pH 7), 0.1, 0.3, 0.6, 1, 2 (Pigments 2 and 5, pH 8). **C)** Spectra at time zero (—) and at the end of the kinetic run (—). 1 equiv.  $\text{Fe}^{2+}$ . Solid curves: pH 7. Dashed curves: pH 8.

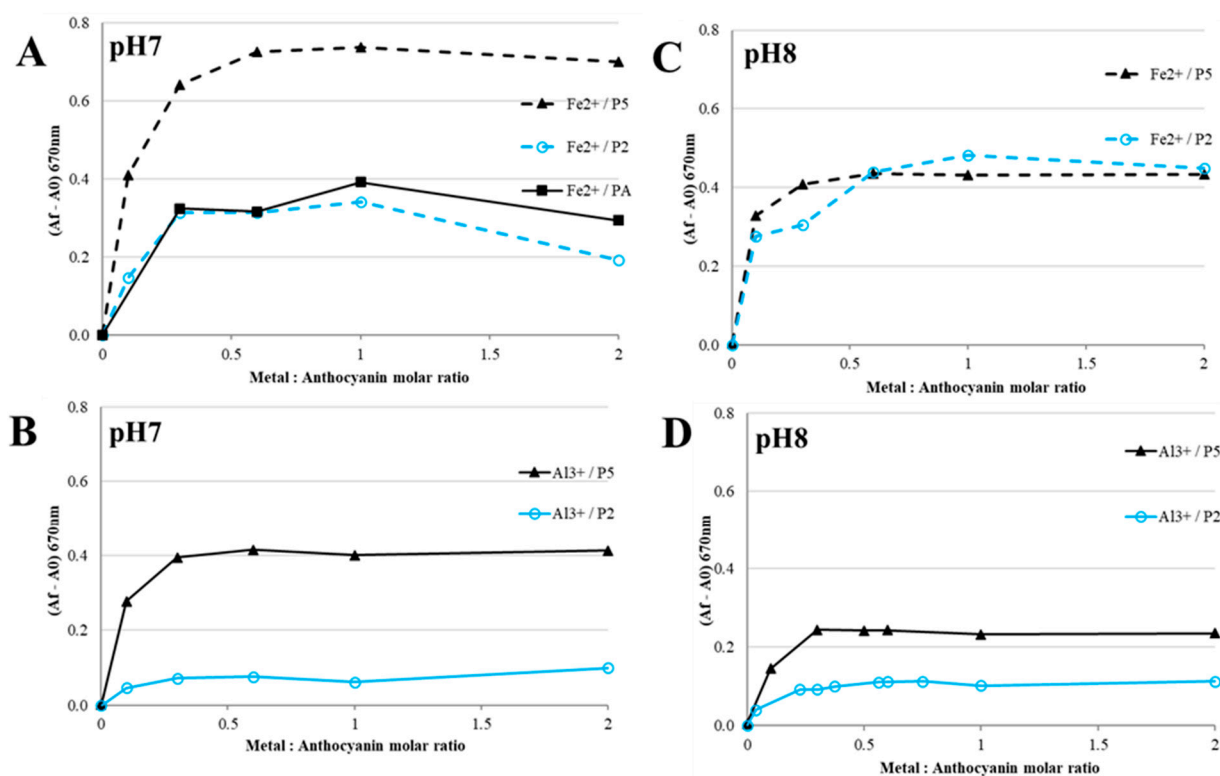

**Fig. 3-SI.** Amplitude of the complex's visible band as a function of the metal/ligand molar ratio. Pigment 2 (○), Pigment 5 (▲).

A)

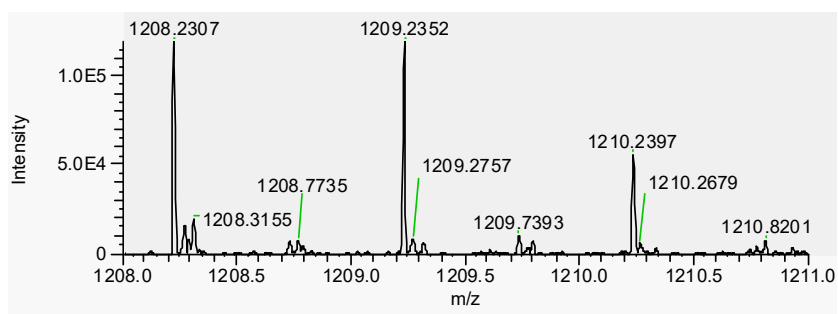

$[P5 - 3H^+ + Fe^{3+}]^+$

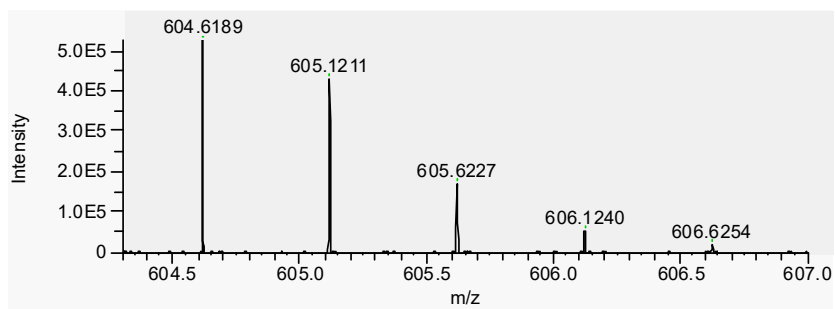

$[P5 - 2H^+ + Fe^{3+}]^{2+}$

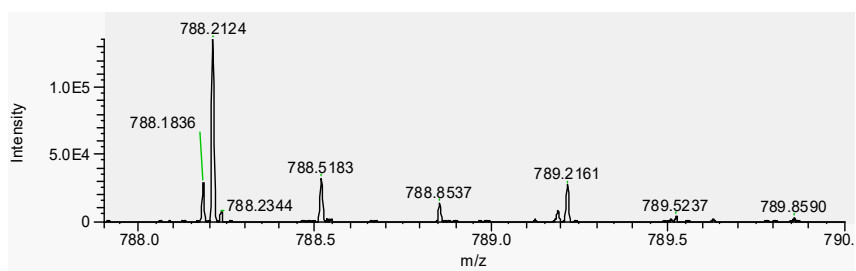

$[2P5 - 2H^+ + Fe^{3+}]^{3+}$

(+ unidentified signals  
at  $m/z$  788.2124 and  
789.2161)

B)

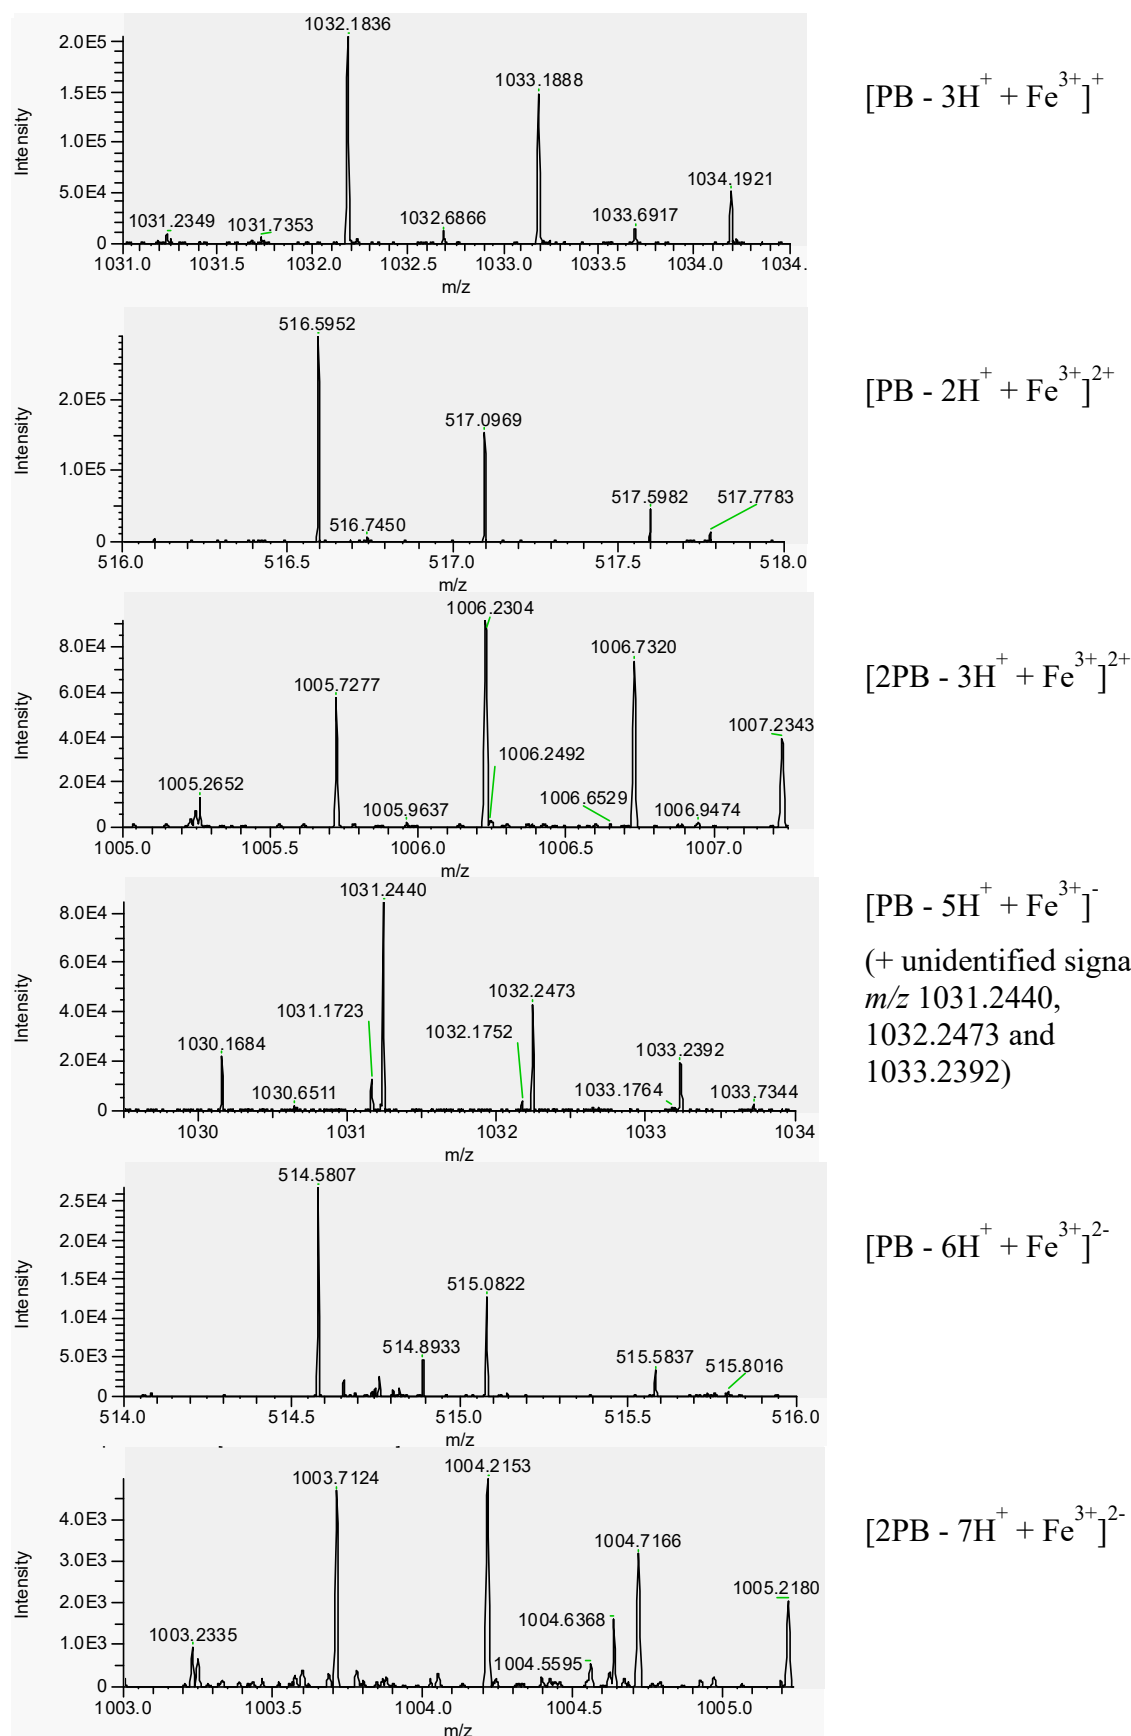

**Fig. 4-SI.** HRMS analyses of iron – anthocyanin complexes (pH 7 ammonium acetate buffer, metal/ligand molar ratio = 1). A) Pigment 5, B) Pigment B.

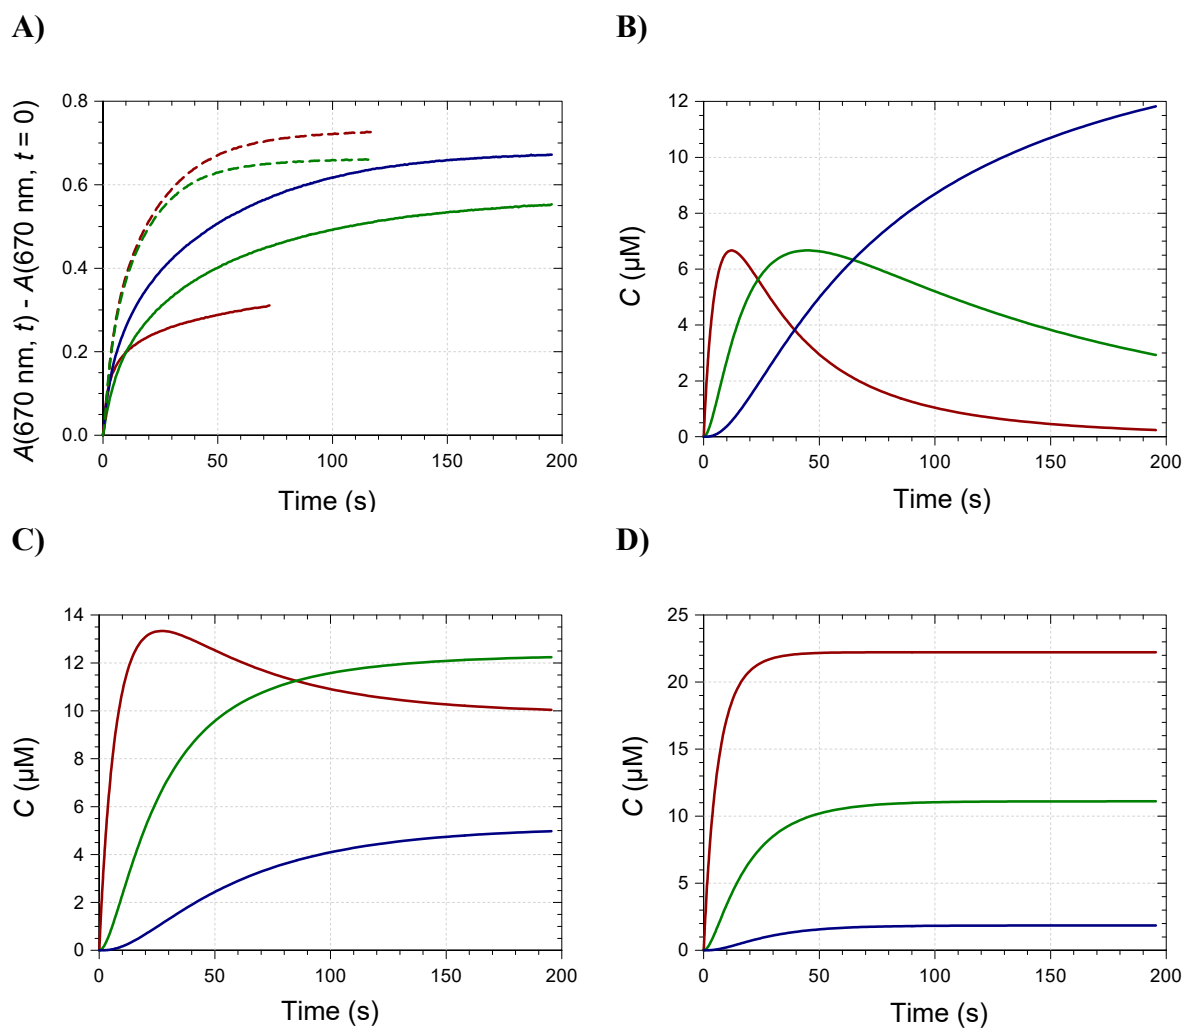

**Fig. 5-SI. A)** Kinetics of  $\text{Al}^{3+}$  – pigment B binding (pH 7, 25°C). Pigment concentration = 50  $\mu\text{M}$ , metal / pigment molar ratio = 0.1 (—), 0.3 (—), 0.6 (—), 1 (---), 2 (---). **B-D)** Speciation diagrams of  $\text{Al}^{3+}$  - pigment B complexes. **B)** 0.3 equiv.  $\text{Al}^{3+}$ . **C)** 0.6 equiv.  $\text{Al}^{3+}$ . **D)** 1 equiv.  $\text{Al}^{3+}$ . ML (—), ML<sub>2</sub> (—), ML<sub>3</sub> (—). ML<sub>n</sub>: metal-ligand complex having a 1:n metal/ligand stoichiometry.

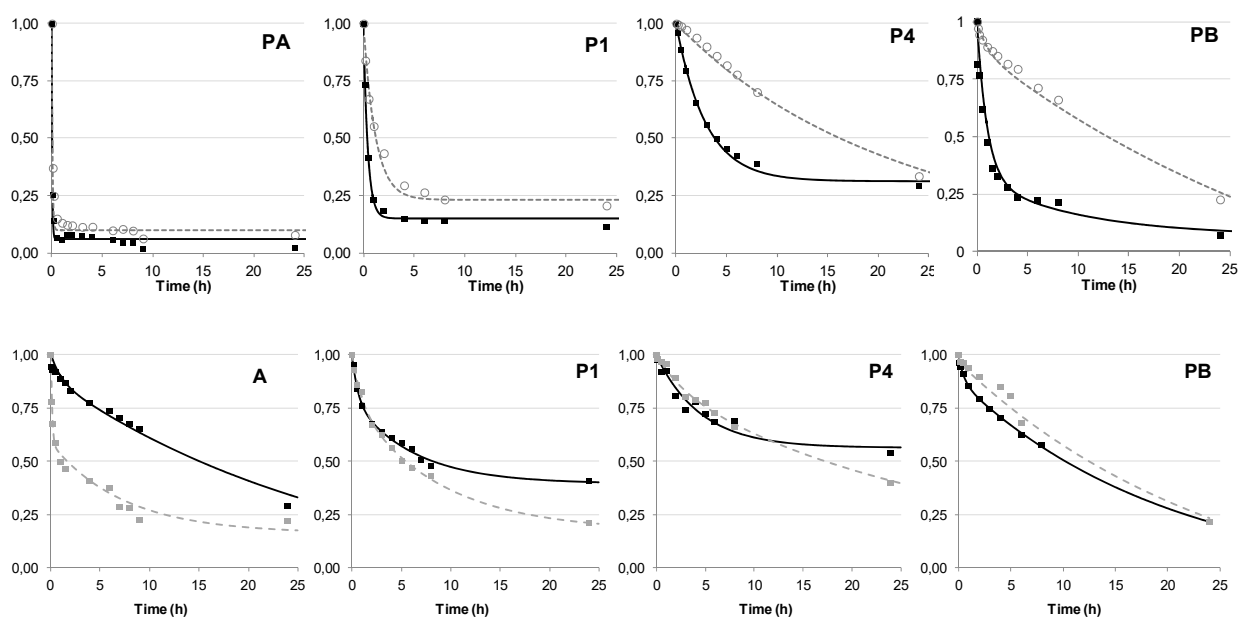

**Fig. 6-SI.** Rate of color loss (*top*) and pigment loss (*bottom*) in solutions of Pigments A, 1, 4 and B at pH 7, 50°C, in the absence (black plain line) or presence (grey dashed line) of 0.6 equiv.  $\text{Fe}^{2+}$ .

**Table 1-SI.** Wavelengths of maximal visible absorption ( $\lambda_{\text{max}}$ , in nm) of PSP anthocyanins (50  $\mu\text{M}$ ) in the absence or presence of  $\text{Al}^{3+}$ , 25°C,  $n = 3$ .

| Pigment | No $\text{Al}^{3+}$ | 0.5 equiv. $\text{Al}^{3+}$ | 1 equiv. $\text{Al}^{3+}$ | 5 equiv. $\text{Al}^{3+}$ |
|---------|---------------------|-----------------------------|---------------------------|---------------------------|
| pH 6    |                     |                             |                           |                           |
| P4'     | 547 (2)             | 562 (1)                     | 563 (1)                   | 569 (1)                   |
| P6'     | 548 (3)             | 572 (2)                     | 574 (1)                   | 581 (1)                   |
| P7'     | 552 (1)             | 570 (0)                     | 575 (3)                   | 584 (1)                   |
| P9b'    | 552 (3)             | 584 (1)                     | 581 (1)                   | 589 (7)                   |
| pH 7    |                     |                             |                           |                           |
| P4'     | 572 (2)             | 583 (1)                     | 580 (0)                   | 576 (3)                   |
| P6'     | 570 (1)             | 591 (3)                     | 591 (2)                   | 590 (1)                   |
| P7'     | 576 (1)             | 594 (0)                     | 598 (1)                   | 595 (0)                   |
| P9b'    | 582 (3)             | 598 (2)                     | 598 (1)                   | 597 (5)                   |
| pH 8    |                     |                             |                           |                           |
| P4'     | 598 (0)             | 596 (1)                     | 596 (1)                   | 594 (4)                   |
| P6'     | 600 (1)             | 602 (2)                     | 601 (1)                   | 597 (3)                   |
| P7'     | 603 (0)             | 603 (0)                     | 601 (0)                   | 602 (1)                   |
| P9b'    | 604 (1)             | 607 (1)                     | 606 (1)                   | 606 (2)                   |

**Table 2-SI.** Hue angle ( $h^0$ ) of PSP anthocyanins (50  $\mu$ M) treated with  $Al^{3+}$ , 25°C,  $n = 3$ .

| Pigment | No $Al^{3+}$ | 0.5 equiv. $Al^{3+}$ | 1 equiv. $Al^{3+}$ | 5 equiv. $Al^{3+}$ |
|---------|--------------|----------------------|--------------------|--------------------|
| pH 6    |              |                      |                    |                    |
| P4'     | 332.1 (1.1)  | 308.7 (1.2)          | 302.6 (0.9)        | 295.7 (0.9)        |
| P6'     | 325.1 (0.6)  | 277.7 (1.5)          | 273.4 (0.4)        | 269.1 (0.2)        |
| P7'     | 311.6 (0.2)  | 285.9 (0.2)          | 280.7 (2.2)        | 271.4 (0.0)        |
| P9b'    | 308.1 (0.8)  | 265.3 (0.2)          | 265.1 (0.2)        | 263.3 (0.5)        |
| pH 7    |              |                      |                    |                    |
| P4'     | 291.6 (0.2)  | 271.6 (0.4)          | 272.3 (0.6)        | 269.4 (1.7)        |
| P6'     | 293.0 (0.2)  | 253.8 (0.4)          | 247.8 (0.2)        | 249.9 (0.3)        |
| P7'     | 285.9 (0.1)  | 261.2 (1.1)          | 254.6 (0.4)        | 249.6 (0.4)        |
| P9b'    | 284.0 (0.3)  | 247.7 (1.2)          | 248.2 (0.9)        | 248.7 (1.2)        |
| pH 8    |              |                      |                    |                    |
| P4'     | 241.6 (0.2)  | 238.4 (0.3)          | 239.3 (0.2)        | 239.7 (0.6)        |
| P6'     | 245.5 (0.2)  | 221.7 (0.1)          | 228.0 (0.7)        | 231.8 (0.3)        |
| P7'     | 245.1 (0.1)  | 235.8 (0.3)          | 239.2 (1.2)        | 238.5 (0.5)        |
| P9b'    | 243.4 (0.4)  | 232.9 (0.2)          | 234.0 (0.3)        | 235.4 (0.3)        |

a)  $h^0$ (PB- $Al^{3+}$  complex, pH 7) = 207.3 vs. 209.4 for Brilliant Blue [8]

**Table 3-SI.** Ions detected for the aluminum complexes of Pigment B (metal/ligand molar ratio = 1).

| Compound                                        | Formula                                              | Th. $m/z$ <sup>a)</sup> | Exp. $m/z$ | $\delta$ (ppm) |
|-------------------------------------------------|------------------------------------------------------|-------------------------|------------|----------------|
| PB <sup>+</sup>                                 | C <sub>44</sub> H <sub>51</sub> O <sub>25</sub>      | 979.2714                | 979.2722   | 0.8            |
| [PB + Al <sup>3+</sup> - 3H] <sup>+</sup>       | C <sub>44</sub> H <sub>48</sub> O <sub>25</sub> Al   | 1003.2295               | 1003.2301  | 0.6            |
| [PB + Al <sup>3+</sup> - 2H] <sup>+2+</sup>     | C <sub>44</sub> H <sub>49</sub> O <sub>25</sub> Al   | 502.1184                | 502.1184   | 0.0            |
| [2PB + Al <sup>3+</sup> - 3H] <sup>+2+</sup>    | C <sub>88</sub> H <sub>99</sub> O <sub>50</sub> Al   | 991.2504                | 991.2510   | 0.6            |
| [PB - 2H] <sup>+ -</sup>                        | C <sub>44</sub> H <sub>49</sub> O <sub>25</sub>      | 977.2563                | 977.2570   | 0.7            |
| [PB + Al <sup>3+</sup> - 5H] <sup>+ -</sup>     | C <sub>44</sub> H <sub>46</sub> O <sub>25</sub> Al   | 1001.2149               | 1001.2151  | 0.2            |
| [PB + Al <sup>3+</sup> - 6H] <sup>+2- -</sup>   | C <sub>44</sub> H <sub>45</sub> O <sub>25</sub> Al   | 500.1038                | 500.1016   | 4.4            |
| [2PB + Al <sup>3+</sup> - 7H] <sup>+2- -</sup>  | C <sub>88</sub> H <sub>95</sub> O <sub>50</sub> Al   | 989.2359                | 989.2363   | 0.4            |
| [3PB + Al <sup>3+</sup> - 8H] <sup>+2- -</sup>  | C <sub>132</sub> H <sub>145</sub> O <sub>75</sub> Al | 1478.3679               | 1478.3765  | 5.8            |
| [3PB + Al <sup>3+</sup> - 9H] <sup>+3- -</sup>  | C <sub>132</sub> H <sub>144</sub> O <sub>75</sub> Al | 985.2429                | 985.2385   | 4.5            |
| [3PB + Al <sup>3+</sup> - 10H] <sup>+4- -</sup> | C <sub>132</sub> H <sub>143</sub> O <sub>75</sub> Al | 738.6803                | 738.6790   | 1.8            |

<sup>a)</sup> Calculations carried out on website <https://www.chemcalc.org/>

**Table 4-SI.** Relative signal intensity (percentage of the free flavylum signal) with varying metal/pigment molar ratios.

|                                                |            | Relative signal intensity |       |       |       |
|------------------------------------------------|------------|---------------------------|-------|-------|-------|
| Ion                                            | Exp. $m/z$ | 0                         | 1/6   | 1/3   | 1     |
| $[\text{P2} - 3\text{H}^+ + \text{Fe}^{3+}]^+$ | 1002.1731  | 0.01%                     | 0.80% | 0.90% | 0.90% |
| $[\text{P5} - 3\text{H}^+ + \text{Fe}^{3+}]^+$ | 1208.2307  | 0.40%                     | 1.1%  | 1.2%  | 4.1%  |
| $[\text{PB} - 3\text{H}^+ + \text{Fe}^{3+}]^+$ | 1032.1836  | 0.03%                     | 0.77% | 0.90% | 0.87% |

**Table 5-SI.** Competition between iron binding and water addition in a pH 4.24 acetate buffer a). Simultaneous kinetic analysis of the spectral changes at 530 nm (free pigment) and 670 nm (iron complexes).  $k'_h$  and  $k'_{-h}$ : apparent rate constants for hydration and dehydration (determined from control experiments in the absence of iron).  $k_f$  and  $k_d$ : rate constants for the formation and dissociation of the complexes.  $k_{\text{autox}}$ : rate constant for the autoxidation of the  $\text{Fe}^{2+}$  complex.

| Pigment                                                       | PB                                                                                                      | P3                                                                                                          |
|---------------------------------------------------------------|---------------------------------------------------------------------------------------------------------|-------------------------------------------------------------------------------------------------------------|
| $k'_h$ ( $\times 10^{-3}$ , $\text{s}^{-1}$ )                 | 33.1 ( $\pm 0.1$ )                                                                                      | 82.4 ( $\pm 0.2$ )                                                                                          |
| $k'_{-h}$ ( $\times 10^{-3}$ , $\text{s}^{-1}$ )              | 29.8 ( $\pm 0.2$ )                                                                                      | 13.0 ( $\pm 0.1$ )                                                                                          |
| $k_f(\text{Fe}^{2+})$ ( $\text{M}^{-1} \text{s}^{-1}$ )       | 680 ( $\pm 7$ )                                                                                         | 346 ( $\pm 16$ )                                                                                            |
| $k_d(\text{Fe}^{2+})$ ( $\times 10^{-4}$ , $\text{s}^{-1}$ )  | 53 ( $\pm 1$ )                                                                                          | -                                                                                                           |
| $k_{\text{autox}}$ ( $\times 10^{-4}$ , $\text{s}^{-1}$ )     | 49.5 ( $\pm 0.3$ )                                                                                      | 187 ( $\pm 9$ )                                                                                             |
| $k_f(\text{Fe}^{3+})$ ( $\text{M}^{-1} \text{s}^{-1}$ ) b)    | $10^4$                                                                                                  | $10^4$                                                                                                      |
| $k_d(\text{Fe}^{3+})$ ( $\times 10^{-3}$ , $\text{s}^{-1}$ )  | 91.9 ( $\pm 0.6$ )                                                                                      | 211 ( $\pm 5$ )                                                                                             |
| $\epsilon$ ( $\times 10^3$ , $\text{M}^{-1} \text{cm}^{-1}$ ) | $\text{Fe}^{\text{II}}$ -PB (670 nm): 3.6 ( $\pm 0.1$ )<br>$\text{Fe}^{\text{III}}$ -PB (670 nm): 24 c) | $\text{Fe}^{\text{III}}$ -PB (530 nm): 10.9 ( $\pm 0.1$ )<br>$\text{Fe}^{\text{III}}$ -PB (670 nm): 13.5 d) |

a) Successive addition of pigment (40  $\mu\text{M}$ ) and  $\text{Fe}^{2+}$  (1 equiv.). The concentrations of free colored and colorless forms at the time of iron addition were estimated from the molar absorption coefficient of the free colored forms at 530 nm:  $26.7 \times 10^3$  (Pigment B) and  $14.9 \times 10^3$  (Pigment 3)  $\text{M}^{-1} \text{cm}^{-1}$ . b) Set constant (values from previous work with synthetic flavylum ions [20]). c) Deduced from the spectrum at pH 7 assuming total binding. d) Deduced from the spectrum at pH 8 assuming total binding), 14900 (free pigment, 530 nm).

**Table 6-SI.** Period of time for 25% loss in color or in total pigment (residual flavylum content assessed after acidification) at pH 7, 50°C.

|                                                                                                                              | <b>PA</b> | <b>P1</b> | <b>P3</b> | <b>P4</b> | <b>PB</b> |
|------------------------------------------------------------------------------------------------------------------------------|-----------|-----------|-----------|-----------|-----------|
| <i>t</i> <sub>25</sub> color (h), no metal added                                                                             | 0.02      | 0.15      | 0.18      | 1.4       | 0.29      |
| <i>t</i> <sub>25</sub> color (h), 0.6 equiv. Fe <sup>2+</sup>                                                                | 0.03      | 0.47      | 0.29      | 4.6       | 4.5       |
| <i>t</i> <sub>25</sub> pigment (h), no metal added                                                                           | 4.5       | 4.4       | 2.0       | 3.7       | 2.6       |
| <i>t</i> <sub>25</sub> pigment (h), 0.6 equiv. Fe <sup>2+</sup>                                                              | 0.12      | 1.4       | 1.9       | 5.2       | 5.5       |
| <i>t</i> <sub>25</sub> pigment (h), no metal added <i>vs</i> <i>t</i> <sub>25</sub> pigment (h), 0.6 equiv. Fe <sup>2+</sup> |           |           |           |           |           |
